# Supplementary material for: Antibodies against SARS-CoV-2 Alpha, Beta, and Gamma Variants in Pregnant Women and Their Neonates under Antenatal Vaccination with Moderna (mRNA-1273) Vaccine
Source: MDPI journal article supplement (doi:10.3390/vaccines10091415), 2022-08-28
Supplement: s1 [file s1]

**Table S1.** SRBD IgG binding ratio for alpha, beta, and gamma variants in different groups.

| Mean         | Total         | Group A<br>(N=8) | Group B<br>(N=8) | Group C<br>(N=8) | Group D<br>(N=8) | Group E<br>(N=2) | Group F<br>(N=5) |
|--------------|---------------|------------------|------------------|------------------|------------------|------------------|------------------|
| Alpha        |               |                  |                  |                  |                  |                  |                  |
| Maternal (%) | 63.95         | 70.84            | 67.56            | 68.93            | 85.57            | 28.56            | 18.78            |
| Neonate (%)  | 72.14         | 83.50            | 79.72            | 80.33            | 89.75            | 34.88            | 15.42            |
| Ratio        | 1.18          | 1.26             | 1.24             | 1.27             | 1.05             | 1.22             | 0.82             |
| Beta         |               |                  |                  |                  |                  |                  |                  |
| Maternal (%) | 47.91         | 54.75            | 53.98            | 41.36            | 58.09            | 5.62             | 38.38            |
| Neonate (%)  | 56.78         | 67.15            | 61.71            | 55.20            | 61.23            | 13.76            | 44.97            |
| Ratio        | 1.52          | 1.29             | 1.36             | 2.55             | 1.12             | 1.25             | 1.15             |
| Gamma        |               |                  |                  |                  |                  |                  |                  |
| Maternal (%) | 43.48         | 55.04            | 46.38            | 43.52            | 53.36            | 15.48            | 15.66            |
| Neonate (%)  | 53.66         | 67.88            | 62.33            | 56.49            | 62.81            | 19.74            | 11.43            |
| Ratio        | 1.54          | 1.37             | 1.84             | 1.76             | 1.51             | 1.22             | 1.17             |
| P value      |               |                  |                  |                  |                  |                  |                  |
| Maternal     | <b>0.0001</b> | <b>0.008</b>     | <b>0.018</b>     | <b>0.010</b>     | <b>0.008</b>     | 0.658            | 0.118            |
| Neonate      | <b>0.006</b>  | 0.116            | 0.075            | 0.068            | <b>0.006</b>     | 0.795            | <b>0.040</b>     |
| Ratio        | <b>0.050</b>  | 0.863            | 0.371            | 0.250            | 0.138            | 0.661            | 0.139            |

Words in bold: p value with significance.

**Table S2.** SRBD IgG binding ratio for SARS-CoV-2 alpha, beta, and gamma variants with different vaccine combinations.

|                                     |        | Alpha type |       |         | Beta type |       |         | Gamma type |       |         |
|-------------------------------------|--------|------------|-------|---------|-----------|-------|---------|------------|-------|---------|
|                                     |        | Arm 1      | Arm 2 | p value | Arm 1     | Arm 2 | p value | Arm 1      | Arm 2 | p value |
|                                     |        | N          | N     |         | N         | N     |         | N          | N     |         |
| Arm 1: 2 COVID-19 +<br>Tdap + Flu   | N      | 8          | 8     |         | 8         | 8     |         | 8          | 8     |         |
|                                     | MP (%) | 70.84      | 85.57 | 0.109   | 54.75     | 58.09 | 0.770   | 55.04      | 53.35 | 0.901   |
|                                     | CB (%) | 83.50      | 89.74 | 0.208   | 67.15     | 61.23 | 0.547   | 67.88      | 62.81 | 0.634   |
| Arm 2: 2 COVID-19                   | Ratio  | 1.26       | 1.05  | 0.113   | 1.29      | 1.11  | 0.327   | 1.37       | 1.51  | 0.681   |
|                                     | N      | 8          | 13    |         | 8         | 13    |         | 8          | 13    |         |
|                                     | MP (%) | 70.84      | 59.88 | 0.416   | 54.75     | 50.51 | 0.669   | 55.04      | 38.86 | 0.216   |
| Arm 1: 1-2 COVID-19 +<br>Tdap + Flu | CB (%) | 83.50      | 61.16 | 0.082   | 67.15     | 54.98 | 0.199   | 67.88      | 43.04 | 0.060   |
|                                     | Ratio  | 1.26       | 1.01  | 0.062   | 1.29      | 1.13  | 0.346   | 1.37       | 1.38  | 0.986   |
|                                     | N      | 8          | 8     |         | 8         | 8     |         | 8          | 8     |         |
| Arm 1: 2 COVID-19 +<br>Tdap + Flu   | MP (%) | 70.84      | 67.56 | 0.764   | 54.75     | 53.98 | 0.946   | 55.04      | 46.38 | 0.493   |
|                                     | CB (%) | 83.50      | 79.73 | 0.563   | 67.15     | 61.71 | 0.537   | 67.88      | 62.33 | 0.586   |
|                                     | Ratio  | 1.26       | 1.24  | 0.906   | 1.29      | 1.36  | 0.813   | 1.37       | 1.84  | 0.383   |
| Arm 1: 2 COVID-19 +<br>Tdap + Flu   | N      | 8          | 8     |         | 8         | 8     |         | 8          | 8     |         |
|                                     | MP (%) | 70.84      | 68.93 | 0.855   | 54.75     | 41.37 | 0.344   | 55.04      | 43.52 | 0.388   |
|                                     | CB (%) | 83.50      | 80.33 | 0.546   | 67.15     | 55.20 | 0.317   | 67.88      | 56.49 | 0.359   |
| Arm 2: 2 COVID-19 + Flu             | Ratio  | 1.26       | 1.27  | 0.935   | 1.29      | 2.55  | 0.165   | 1.37       | 1.76  | 0.406   |
|                                     | N      | 8          | 8     |         | 8         | 8     |         | 8          | 8     |         |
|                                     | MP (%) | 67.56      | 85.57 | 0.051   | 53.98     | 58.09 | 0.746   | 46.38      | 53.36 | 0.627   |
| Arm 1: 2 COVID-19 +<br>Tdap         | CB (%) | 79.73      | 89.75 | 0.088   | 61.71     | 61.23 | 0.957   | 62.33      | 62.81 | 0.965   |
|                                     | Ratio  | 1.24       | 1.05  | 0.070   | 1.36      | 1.12  | 0.293   | 1.84       | 1.51  | 0.567   |
|                                     | N      | 8          | 8     |         | 8         | 8     |         | 8          | 8     |         |

|                             |        |       |       |              |       |       |              |       |       |              |
|-----------------------------|--------|-------|-------|--------------|-------|-------|--------------|-------|-------|--------------|
| Arm 1: 1 COVID-19 +<br>Tdap | N      | 2     | 5     |              | 2     | 5     |              | 2     | 5     |              |
|                             | MP (%) | 28.56 | 18.78 | 0.832        | 5.62  | 38.38 | <b>0.029</b> | 15.49 | 15.66 | 0.989        |
|                             | CB (%) | 34.88 | 15.43 | 0.492        | 13.76 | 44.97 | 0.114        | 19.75 | 11.43 | 0.466        |
| Arm 2: 1 COVID-19           | Ratio  | 1.22  | 0.82  | 0.048        | 1.25  | 1.15  | 0.865        | 1.22  | 1.17  | 0.941        |
|                             | N      | 8     | 2     |              | 8     | 2     |              | 8     | 2     |              |
|                             | MP (%) | 67.56 | 28.56 | 0.077        | 53.98 | 5.62  | <b>0.032</b> | 46.38 | 15.49 | 0.159        |
| Arm 2: 1 COVID-19 +<br>Tdap | CB (%) | 79.73 | 34.88 | 0.418        | 61.71 | 13.76 | <b>0.003</b> | 62.33 | 19.75 | <b>0.032</b> |
|                             | Ratio  | 1.24  | 1.22  | 0.948        | 1.36  | 1.25  | 0.863        | 1.84  | 1.22  | 0.566        |
|                             | N      | 8     | 8     |              | 8     | 8     |              | 8     | 8     |              |
| Arm 1: 2 COVID-19 +<br>Tdap | MP (%) | 68.93 | 85.57 | <b>0.044</b> | 41.37 | 58.09 | 0.269        | 43.52 | 53.36 | 0.511        |
|                             | CB (%) | 80.33 | 89.75 | <b>0.022</b> | 55.20 | 61.23 | 0.613        | 56.49 | 62.81 | 0.627        |
|                             | Ratio  | 1.27  | 1.05  | 0.201        | 2.55  | 1.12  | 0.116        | 1.76  | 1.51  | 0.622        |
| Arm 1: 2 COVID-19           | N      | 8     | 5     |              | 8     | 5     |              | 8     | 5     |              |
|                             | MP (%) | 85.57 | 18.78 | <b>0.006</b> | 58.09 | 38.38 | 0.093        | 53.36 | 15.66 | <b>0.011</b> |
|                             | CB (%) | 89.75 | 15.43 | <b>0.002</b> | 61.23 | 44.97 | 0.189        | 62.81 | 11.43 | <b>0.001</b> |
| Arm 2: 1 COVID-19           | Ratio  | 1.05  | 0.82  | <b>0.001</b> | 1.12  | 1.15  | 0.895        | 1.51  | 1.17  | 0.504        |
|                             | N      | 8     | 8     |              | 8     | 8     |              | 8     | 8     |              |
|                             | MP (%) | 67.56 | 68.93 | 0.895        | 53.98 | 41.37 | 0.403        | 46.38 | 43.52 | 0.837        |
| Arm 1: 2 COVID-19 +<br>Tdap | CB (%) | 79.73 | 80.33 | 0.918        | 61.71 | 55.20 | 0.558        | 62.33 | 56.49 | 0.643        |
|                             | Ratio  | 1.24  | 1.27  | 0.859        | 1.36  | 2.55  | 0.187        | 1.84  | 1.76  | 0.910        |
|                             | N      | 8     | 8     |              | 8     | 8     |              | 8     | 8     |              |
| Arm 2: 2 COVID-19 +<br>Flu  | MP (%) | 68.93 | 85.57 | <b>0.044</b> | 41.37 | 58.09 | 0.269        | 43.52 | 53.36 | 0.511        |
|                             | CB (%) | 80.33 | 89.75 | <b>0.022</b> | 55.20 | 61.23 | 0.613        | 56.49 | 62.81 | 0.627        |
|                             | Ratio  | 1.27  | 1.05  | 0.201        | 2.55  | 1.12  | 0.116        | 1.76  | 1.51  | 0.622        |
| Arm 1: 2 COVID-19           | N      | 8     | 5     |              | 8     | 5     |              | 8     | 5     |              |
|                             | MP (%) | 85.57 | 18.78 | <b>0.006</b> | 58.09 | 38.38 | 0.093        | 53.36 | 15.66 | <b>0.011</b> |
|                             | CB (%) | 89.75 | 15.43 | <b>0.002</b> | 61.23 | 44.97 | 0.189        | 62.81 | 11.43 | <b>0.001</b> |
| Arm 2: 1 COVID-19           | Ratio  | 1.05  | 0.82  | <b>0.001</b> | 1.12  | 1.15  | 0.895        | 1.51  | 1.17  | 0.504        |
|                             | N      | 8     | 8     |              | 8     | 8     |              | 8     | 8     |              |
|                             | MP (%) | 67.56 | 68.93 | 0.895        | 53.98 | 41.37 | 0.403        | 46.38 | 43.52 | 0.837        |
| Arm 1: 2 COVID-19 +<br>Tdap | CB (%) | 79.73 | 80.33 | 0.918        | 61.71 | 55.20 | 0.558        | 62.33 | 56.49 | 0.643        |
|                             | Ratio  | 1.24  | 1.27  | 0.859        | 1.36  | 2.55  | 0.187        | 1.84  | 1.76  | 0.910        |
|                             | N      | 8     | 8     |              | 8     | 8     |              | 8     | 8     |              |

MP, maternal plasma; CB, cord blood; COVID-19, COVID-19 vaccines; Tdap, tetanus toxoid, reduced diphtheria toxoid, and acellular pertussis vaccine; Flu, influenza vaccine; Words in bold: p value with significance.

**Table S3.** SRBD IgG binding ratio for SARS-CoV-2 alpha, beta, and gamma variants with different vaccines combinations and 2 COVID-19 vaccine interval of 4 weeks.

|                                   | Alpha type |       |         | Beta type |       |         | Gamma type   |       |         |
|-----------------------------------|------------|-------|---------|-----------|-------|---------|--------------|-------|---------|
|                                   | Arm 1      | Arm 2 | p value | Arm 1     | Arm 2 | p value | Arm 1        | Arm 2 | p value |
| Interval 4 weeks                  |            |       |         |           |       |         |              |       |         |
| Arm 1: 2 COVID-19 +<br>Tdap + Flu | N          | 3     | 1       | 3         | 1     |         | 3            | 1     |         |
|                                   | MP (%)     | 61.47 | 71.88   | 0.729     | 46.95 | 78.18   | 0.132        | 48.06 | 65.59   |
|                                   | CB (%)     | 77.98 | 82.26   | 0.811     | 57.45 | 82.43   | 0.479        | 65.18 | 66.47   |
| Arm 2: 2 COVID-19                 | Ratio      | 1.34  | 1.14    | 0.657     | 1.20  | 1.05    | 0.789        | 1.51  | 1.01    |
|                                   | N          | 3     | 3       | 3         | 3     |         | 3            | 3     |         |
|                                   | MP (%)     | 61.47 | 66.93   | 0.806     | 46.95 | 61.06   | 0.497        | 48.06 | 66.63   |
| Arm 2: 2 COVID-19 +<br>Tdap       | CB (%)     | 77.98 | 82.53   | 0.718     | 57.45 | 71.49   | 0.441        | 65.18 | 79.70   |
|                                   | Ratio      | 1.34  | 1.33    | 0.976     | 1.20  | 1.38    | 0.709        | 1.51  | 1.21    |
|                                   | N          | 3     | 2       | 3         | 2     |         | 3            | 2     |         |
| Arm 1: 2 COVID-19 +<br>Tdap + Flu | MP (%)     | 61.47 | 84.59   | 0.268     | 46.95 | 5.77    | <b>0.017</b> | 48.06 | 10.99   |
|                                   | CB (%)     | 77.98 | 91.07   | 0.290     | 57.45 | 30.25   | 0.302        | 65.18 | 27.89   |
|                                   | Ratio      | 1.34  | 1.08    | 0.362     | 1.20  | 5.92    | 0.129        | 1.51  | 3.31    |
| Arm 2: 2 COVID-19 +<br>Flu        | N          | 3     | 1       | 3         | 1     |         | 3            | 1     |         |
|                                   | MP (%)     | 66.93 | 71.88   | 0.893     | 61.06 | 78.18   | 0.678        | 66.63 | 65.59   |
|                                   | CB (%)     | 82.53 | 82.26   | 0.989     | 71.49 | 82.43   | 0.553        | 79.70 | 66.47   |
| Arm 1: 2 COVID-19 +<br>Tdap       | Ratio      | 1.33  | 1.14    | 0.689     | 1.38  | 1.05    | 0.704        | 1.21  | 1.01    |
|                                   | N          | 2     | 1       | 2         | 1     |         | 2            | 1     |         |
|                                   | MP (%)     | 84.59 | 71.88   | 0.282     | 5.77  | 78.18   | 0.055        | 10.99 | 65.59   |
| Arm 2: 2 COVID-19                 | CB (%)     | 91.07 | 82.26   | 0.144     | 30.25 | 82.43   | 0.299        | 27.89 | 66.47   |
|                                   | Ratio      | 1.08  | 1.14    | 0.426     | 5.92  | 1.05    | 0.233        | 3.31  | 1.01    |
|                                   | N          | 2     | 1       | 2         | 1     |         | 2            | 1     |         |

|                             |        |       |       |       |       |       |       |       |       |              |
|-----------------------------|--------|-------|-------|-------|-------|-------|-------|-------|-------|--------------|
| Arm 1: 2 COVID-19 +<br>Tdap | N      | 3     | 2     |       | 3     | 2     |       | 3     | 2     |              |
|                             | MP (%) | 66.93 | 84.59 | 0.464 | 61.06 | 5.77  | 0.097 | 66.63 | 10.99 | <b>0.009</b> |
| Arm 2: 2 COVID-19 +<br>Flu  | CB (%) | 82.53 | 91.07 | 0.505 | 71.49 | 30.25 | 0.073 | 79.70 | 27.89 | <b>0.008</b> |
|                             | Ratio  | 1.33  | 1.08  | 0.402 | 1.38  | 5.92  | 0.118 | 1.21  | 3.31  | 0.357        |

MP, maternal plasma; CB, cord blood; COVID-19, COVID-19 vaccines; Tdap, tetanus toxoid, reduced diphtheria toxoid, and acellular pertussis vaccine; Flu, influenza vaccine; Words in bold: p value with significance.

**Table S4.** SRBD IgG binding ratio for SARS-CoV-2 alpha, beta, and gamma variants with different vaccines combinations and 2 COVID-19 vaccine interval of 4 – 6 weeks.

|                                   |        | Alpha type |       |              | Beta type |       |         | Gamma type |       |         |
|-----------------------------------|--------|------------|-------|--------------|-----------|-------|---------|------------|-------|---------|
| Interval 4 – 6 weeks              |        | Arm 1      | Arm 2 | p value      | Arm 1     | Arm 2 | p value | Arm 1      | Arm 2 | p value |
| Arm 1: 2 COVID-19 +<br>Tdap + Flu | N      | 2          | 3     |              | 2         | 3     |         | 2          | 3     |         |
|                                   | MP (%) | 85.82      | 85.84 | 0.999        | 65.12     | 49.06 | 0.524   | 66.77      | 49.82 | 0.550   |
|                                   | CB (%) | 93.82      | 88.25 | 0.413        | 73.92     | 56.09 | 0.429   | 72.71      | 58.04 | 0.461   |
| Arm 2: 2 COVID-19                 | Ratio  | 1.10       | 1.03  | 0.550        | 1.15      | 1.19  | 0.771   | 1.07       | 1.46  | 0.551   |
| Arm 1: 2 COVID-19 +<br>Tdap + Flu | N      | 2          | 5     |              | 2         | 5     |         | 2          | 5     |         |
|                                   | MP (%) | 85.82      | 67.95 | 0.301        | 65.12     | 49.72 | 0.482   | 66.77      | 34.23 | 0.154   |
|                                   | CB (%) | 93.82      | 78.05 | 0.083        | 73.92     | 55.85 | 0.254   | 72.71      | 51.91 | 0.271   |
| Arm 2: 2 COVID-19 +<br>Tdap       | Ratio  | 1.10       | 1.19  | 0.601        | 1.15      | 1.35  | 0.684   | 1.07       | 2.21  | 0.410   |
| Arm 1: 2 COVID-19 +<br>Tdap + Flu | N      | 2          | 5     |              | 2         | 5     |         | 2          | 5     |         |
|                                   | MP (%) | 85.82      | 63.66 | 0.256        | 65.12     | 51.09 | 0.606   | 66.77      | 51.28 | 0.452   |
|                                   | CB (%) | 93.82      | 75.86 | <b>0.019</b> | 73.92     | 60.22 | 0.537   | 72.71      | 63.06 | 0.686   |
| Arm 2: 2 COVID-19 +<br>Flu        | Ratio  | 1.10       | 1.35  | 0.597        | 1.15      | 1.46  | 0.646   | 1.07       | 1.26  | 0.350   |
| Arm 1: 2 COVID-19 +<br>Tdap       | N      | 5          | 3     |              | 5         | 3     |         | 5          | 3     |         |
|                                   | MP (%) | 67.95      | 85.84 | 0.190        | 49.72     | 49.06 | 0.971   | 34.23      | 49.82 | 0.481   |
|                                   | CB (%) | 78.05      | 88.25 | 0.227        | 55.85     | 56.09 | 0.984   | 51.91      | 58.03 | 0.651   |
| Arm 2: 2 COVID-19                 | Ratio  | 1.19       | 1.03  | 0.211        | 1.35      | 1.19  | 0.681   | 2.21       | 1.46  | 0.501   |
| Arm 1: 2 COVID-19 +<br>Flu        | N      | 5          | 3     |              | 5         | 3     |         | 5          | 3     |         |
|                                   | MP (%) | 63.66      | 85.84 | 0.154        | 51.09     | 49.06 | 0.928   | 51.28      | 49.82 | 0.946   |
|                                   | CB (%) | 75.86      | 88.25 | <b>0.045</b> | 60.22     | 56.09 | 0.818   | 63.06      | 58.04 | 0.784   |
| Arm 2: 2 COVID-19                 | Ratio  | 1.35       | 1.03  | 0.390        | 1.46      | 1.19  | 0.613   | 1.26       | 1.46  | 0.702   |
| Arm 1: 2 COVID-19 +<br>Tdap       | N      | 5          | 5     |              | 5         | 5     |         | 5          | 5     |         |
|                                   | MP (%) | 67.95      | 63.66 | 0.753        | 49.72     | 51.09 | 0.940   | 34.23      | 51.28 | 0.319   |
|                                   | CB (%) | 78.05      | 75.86 | 0.766        | 55.85     | 60.22 | 0.743   | 51.91      | 63.06 | 0.473   |
| Arm 2: 2 COVID-19 +<br>Flu        | Ratio  | 1.19       | 1.35  | 0.563        | 1.35      | 1.46  | 0.820   | 2.21       | 1.26  | 0.248   |

MP, maternal plasma; CB, cord blood; COVID-19, COVID-19 vaccines; Tdap, tetanus toxoid, reduced diphtheria toxoid, and acellular pertussis vaccine; Flu, influenza vaccine; Words in bold: p value with significance.

**Table S5.** SRBD IgG binding ratio for SARS-CoV-2 alpha, beta, and gamma variants with different vaccines combinations and 2 COVID-19 vaccine interval of > 6 weeks.

|                                   |        | Alpha type |       |              | Beta type |       |         | Gamma type |       |         |
|-----------------------------------|--------|------------|-------|--------------|-----------|-------|---------|------------|-------|---------|
| Interval > 6 weeks                |        | Arm 1      | Arm 2 | p value      | Arm 1     | Arm 2 | p value | Arm 1      | Arm 2 | p value |
| Arm 1: 2 COVID-19 +<br>Tdap + Flu | N      | 2          | 3     |              | 2         | 3     |         | 2          | 3     |         |
|                                   | MP (%) | 59.41      | 87.73 | 0.355        | 68.27     | 65.29 | 0.919   | 67.52      | 57.51 | 0.798   |
|                                   | CB (%) | 75.76      | 92.45 | <b>0.028</b> | 74.34     | 59.33 | 0.516   | 70.35      | 69.77 | 0.987   |
| Arm 2: 2 COVID-19                 | Ratio  | 1.39       | 1.06  | 0.545        | 1.12      | 0.97  | 0.543   | 1.03       | 1.78  | 0.451   |

| Arm 1: 2 COVID-19 + Tdap + Flu |        | N     | 2     | 2     |       | 2     |       |       |       |
|--------------------------------|--------|-------|-------|-------|-------|-------|-------|-------|-------|
| Arm 2: 2 COVID-19 + Tdap       | MP (%) | 59.41 | 0     | -     | 68.27 | 0     | -     | 67.52 | 0     |
|                                | CB (%) | 75.76 |       |       | 74.34 |       |       | 70.35 |       |
|                                | Ratio  | 1.39  |       |       | 1.12  |       |       | 1.03  |       |
| Arm 1: 2 COVID-19 + Tdap + Flu | N      | 2     | 1     | 2     |       | 1     |       | 2     |       |
|                                | MP (%) | 59.41 | 63.96 | 0.910 | 68.27 | 63.95 | 0.900 | 67.52 | 69.73 |
| Arm 2: 2 COVID-19 + Flu        | CB (%) | 75.76 | 81.19 | 0.436 | 74.34 | 79.99 | 0.793 | 70.35 | 80.86 |
|                                | Ratio  | 1.39  | 1.27  | 0.882 | 1.12  | 1.25  | 0.621 | 1.03  | 1.16  |
| Arm 1: 2 COVID-19 + Tdap       | N      | 3     |       | 3     |       | 3     |       |       |       |
|                                | MP (%) | 0     | 87.73 | -     | 0     | 65.29 | -     | 0     | 57.51 |
| Arm 2: 2 COVID-19              | CB (%) |       | 92.45 |       |       | 59.33 |       |       | 69.77 |
|                                | Ratio  |       | 1.06  |       |       | 0.97  |       |       | 1.78  |
| Arm 1: 2 COVID-19 + Flu        | N      | 1     | 3     | 1     |       | 3     |       | 1     |       |
| Arm 2: 2 COVID-19              | MP (%) | 63.96 | 87.73 | 0.147 | 63.95 | 65.29 | 0.975 | 69.73 | 57.51 |
|                                | CB (%) | 81.19 | 92.45 | 0.187 | 79.99 | 59.33 | 0.558 | 80.86 | 69.77 |
|                                | Ratio  | 1.27  | 1.06  | 0.183 | 1.25  | 0.97  | 0.447 | 1.16  | 1.78  |
| Arm 1: 2 COVID-19 + Tdap       | N      | 1     |       | 1     |       | 1     |       |       |       |
|                                | MP (%) | 0     | 63.96 | -     | 0     | 63.95 | -     | 0     | 69.73 |
| Arm 2: 2 COVID-19 + Flu        | CB (%) |       | 81.19 |       |       | 79.99 |       |       | 80.86 |
|                                | Ratio  |       | 1.27  |       |       | 1.25  |       |       | 1.16  |

**Table S6.** SRBD IgG binding ratio for SARS-CoV-2 alpha, beta, and gamma variants with different intervals from 2<sup>nd</sup> COVID-19 vaccine dose to childbirth.

Arm 1: ≤ 6  
ks  
Arm 2: 6 –  
8 wks      N      5      6      5      8      6  
Arm 3: 8 – MP (%) 66.87 58.22 45.59 51.07 33.22 0.284  
10 wks    CB (%) 73.57 68.17 64.28 58.54 52.59 0.591  
Arm 4: 10    Ratio    1.12    1.28    1.72    1.29    2.67    **0.042**  
– 12 wks  
Arm 3: >  
12 wks

MP, maternal plasma; CB, cord blood; wks, weeks; Words in bold: p value with significance.

**Table S7.** SRBD IgG binding ratio for SARS-CoV-2 alpha, beta, and gamma variants with different vaccines combinations and a ≤ 6-week interval between the 2<sup>nd</sup> dose of COVID-19 vaccine and childbirth.

| Interval ≤ 6 weeks                |        | Alpha type |       |         | Beta type |       |         | Gamma type |       |         |
|-----------------------------------|--------|------------|-------|---------|-----------|-------|---------|------------|-------|---------|
|                                   |        | Arm 1      | Arm 2 | p value | Arm 1     | Arm 2 | p value | Arm 1      | Arm 2 | p value |
| Arm 1: 2 COVID-19 +<br>Tdap + Flu | N      | 1          | 3     |         | 1         | 3     |         | 1          | 3     |         |
|                                   | MP (%) | 95.76      | 87.88 | 0.588   | 83.19     | 69.72 | 0.667   | 72.45      | 69.67 | 0.929   |
|                                   | CB (%) | 97.32      | 89.52 | 0.516   | 90.62     | 64.21 | 0.183   | 90.37      | 71.96 | 0.504   |
| Arm 2: 2 COVID-19                 | Ratio  | 1.02       | 1.02  | 0.897   | 1.09      | 0.98  | 0.775   | 1.25       | 1.06  | 0.436   |
| Arm 1: 2 COVID-19 +<br>Tdap + Flu | N      | 1          | 1     |         | 1         | 1     |         | 1          | 1     |         |
|                                   | MP (%) | 95.76      | 66.45 |         | 83.19     | 76.93 |         | 72.45      | 52.89 |         |
|                                   | CB (%) | 97.32      | 71.11 | -       | 90.62     | 67.39 | -       | 90.37      | 61.59 | -       |
| Arm 2: 2 COVID-19 +<br>Tdap       | Ratio  | 1.02       | 1.07  |         | 1.09      | 0.88  |         | 1.25       | 1.16  |         |
| Arm 1: 2 COVID-19 +<br>Tdap + Flu | N      | 1          |       |         | 1         |       |         | 1          |       |         |
|                                   | MP (%) | 95.76      |       |         | 83.19     |       |         | 72.45      |       |         |
|                                   | CB (%) | 97.32      | 0     | -       | 90.62     | 0     | -       | 90.37      | 0     | -       |
| Arm 2: 2 COVID-19 +<br>Flu        | Ratio  | 1.02       |       |         | 1.09      |       |         | 1.25       |       |         |
| Arm 1: 2 COVID-19 +<br>Tdap       | N      | 1          | 3     |         | 1         | 3     |         | 1          | 3     |         |
|                                   | MP (%) | 66.45      | 87.88 | 0.224   | 76.93     | 69.72 | 0.814   | 52.89      | 69.67 | 0.604   |
|                                   | CB (%) | 71.11      | 89.52 | 0.206   | 67.39     | 64.21 | 0.832   | 61.59      | 71.96 | 0.693   |
| Arm 2: 2 COVID-19                 | Ratio  | 1.07       | 1.02  | 0.255   | 0.88      | 0.98  | 0.780   | 1.16       | 1.06  | 0.647   |
| Arm 1: 2 COVID-19 +<br>Flu        | N      |            | 3     |         |           | 3     |         |            | 3     |         |
|                                   | MP (%) |            | 87.88 |         |           | 69.72 |         |            | 69.67 |         |
|                                   | CB (%) | 0          | 89.52 | -       | 0         | 64.21 | -       | 0          | 71.96 | -       |
| Arm 2: 2 COVID-19                 | Ratio  |            | 1.02  |         |           | 0.98  |         |            | 1.06  |         |
| Arm 1: 2 COVID-19 +<br>Tdap       | N      | 1          |       |         | 1         |       |         | 1          |       |         |
|                                   | MP (%) | 66.45      |       |         | 76.93     |       |         | 52.89      |       |         |
|                                   | CB (%) | 71.11      | 0     | -       | 67.39     | 0     | -       | 61.59      | 0     | -       |
| Arm 2: 2 COVID-19 +<br>Flu        | Ratio  | 1.07       |       |         | 0.88      |       |         | 1.16       |       |         |

MP, maternal plasma; CB, cord blood; COVID-19, COVID-19 vaccines; Tdap, tetanus toxoid, reduced diphtheria toxoid, and acellular pertussis vaccine; Flu, influenza vaccine.

**Table S8.** SRBD IgG binding ratio for SARS-CoV-2 alpha, beta, and gamma variants with different vaccines combinations and a 6 – 8-week interval between the 2<sup>nd</sup> dose of COVID-19 vaccine and childbirth.

| Alpha type | Beta type | Gamma type |
|------------|-----------|------------|
|------------|-----------|------------|

| Interval 6 – 8 weeks           |        | Arm 1 | Arm 2 | p value      | Arm 1 | Arm 2 | p value      | Arm 1 | Arm 2 | p value |
|--------------------------------|--------|-------|-------|--------------|-------|-------|--------------|-------|-------|---------|
|                                |        | N     | 1     | 2            |       | 1     | 2            |       | 1     | 2       |
| Arm 1: 2 COVID-19 + Tdap + Flu | MP (%) | 77.90 | 75.82 | 0.811        | 84.03 | 77.71 | 0.081        | 90.13 | 74.52 | 0.497   |
|                                | CB (%) | 78.33 | 87.54 | 0.498        | 84.05 | 83.31 | 0.715        | 95.22 | 79.52 | 0.613   |
| Arm 2: 2 COVID-19              | Ratio  | 1.01  | 1.15  | 0.071        | 1.00  | 1.07  | 0.257        | 1.06  | 1.06  | 0.963   |
| Arm 1: 2 COVID-19 + Tdap + Flu | N      | 1     | 1     |              | 1     | 1     |              | 1     | 1     |         |
|                                | MP (%) | 77.90 | 43.25 | -            | 84.03 | 57.75 | -            | 90.13 | 28.09 | -       |
| Arm 2: 2 COVID-19 + Tdap       | CB (%) | 78.33 | 64.61 | -            | 84.04 | 58.28 | -            | 95.22 | 58.56 | -       |
|                                | Ratio  | 1.01  | 1.49  |              | 1.00  | 1.01  |              | 1.06  | 2.08  |         |
| Arm 1: 2 COVID-19 + Tdap + Flu | N      | 1     | 2     |              | 1     | 2     |              | 1     | 2     |         |
|                                | MP (%) | 77.90 | 74.33 | 0.875        | 84.03 | 39.97 | 0.481        | 90.13 | 41.03 | 0.504   |
| Arm 2: 2 COVID-19 + Flu        | CB (%) | 78.33 | 80.24 | 0.456        | 84.05 | 50.14 | 0.631        | 95.22 | 48.09 | 0.559   |
|                                | Ratio  | 1.01  | 1.10  | 0.793        | 1.00  | 1.26  | <b>0.037</b> | 1.06  | 1.20  | 0.298   |
| Arm 1: 2 COVID-19 + Tdap       | N      | 1     | 2     |              | 1     | 2     |              | 1     | 2     |         |
|                                | MP (%) | 43.25 | 75.82 | 0.132        | 57.75 | 77.71 | <b>0.026</b> | 28.01 | 74.52 | 0.205   |
| Arm 2: 2 COVID-19              | CB (%) | 64.61 | 87.54 | 0.241        | 58.28 | 83.31 | <b>0.039</b> | 58.56 | 79.52 | 0.524   |
|                                | Ratio  | 1.49  | 1.15  | <b>0.031</b> | 1.01  | 1.07  | 0.289        | 2.08  | 1.06  | 0.051   |
| Arm 1: 2 COVID-19 + Flu        | N      | 2     | 2     |              | 2     | 2     |              | 2     | 2     |         |
|                                | MP (%) | 74.33 | 75.82 | 0.905        | 39.97 | 77.71 | 0.256        | 41.03 | 74.52 | 0.381   |
| Arm 2: 2 COVID-19              | CB (%) | 80.24 | 87.54 | 0.307        | 50.14 | 83.31 | 0.382        | 48.09 | 79.52 | 0.467   |
|                                | Ratio  | 1.10  | 1.15  | 0.788        | 1.26  | 1.07  | <b>0.011</b> | 1.20  | 1.06  | 0.159   |
| Arm 1: 2 COVID-19 + Tdap       | N      | 1     | 2     |              | 1     | 2     |              | 1     | 2     |         |
|                                | MP (%) | 43.25 | 74.33 | 0.334        | 57.75 | 39.97 | 0.742        | 28.09 | 41.03 | 0.838   |
| Arm 2: 2 COVID-19 + Flu        | CB (%) | 64.61 | 80.24 | 0.067        | 58.28 | 50.14 | 0.901        | 58.56 | 48.09 | 0.884   |
|                                | Ratio  | 1.49  | 1.10  | 0.405        | 1.01  | 1.26  | <b>0.038</b> | 2.08  | 1.20  | 0.053   |

MP, maternal plasma; CB, cord blood; COVID-19, COVID-19 vaccines; Tdap, tetanus toxoid, reduced diphtheria toxoid, and acellular pertussis vaccine; Flu, influenza vaccine; Words in bold: p value with significance.

**Table S9.** SRBD IgG binding ratio for SARS-CoV-2 alpha, beta, and gamma variants with different vaccines combinations and an 8 – 10-week interval between the 2<sup>nd</sup> dose of COVID-19 vaccine and childbirth.

|                                |        | Alpha type |       |         | Beta type |       |         | Gamma type |       |         |
|--------------------------------|--------|------------|-------|---------|-----------|-------|---------|------------|-------|---------|
| Interval 8 – 10 weeks          |        | Arm 1      | Arm 2 | p value | Arm 1     | Arm 2 | p value | Arm 1      | Arm 2 | p value |
| Arm 1: 2 COVID-19 + Tdap + Flu | N      | 1          | 1     |         | 1         | 1     |         | 1          | 1     |         |
|                                | MP(%)  | 55.04      | 86.09 |         | 59.49     | 28.67 |         | 52.19      | 8.73  |         |
|                                | CB (%) | 67.84      | 87.34 | -       | 76.96     | 32.94 | -       | 76.09      | 27.14 | -       |
| Arm 2: 2 COVID-19              | Ratio  | 1.23       | 1.01  |         | 1.29      | 1.15  |         | 1.46       | 3.11  |         |
|                                | N      | 1          | 1     |         | 1         | 1     |         | 1          | 1     |         |
| Arm 1: 2 COVID-19 + Tdap + Flu | MP(%)  | 55.04      | 65.81 |         | 59.49     | 68.34 |         | 52.19      | 69.44 |         |
|                                | CB (%) | 67.84      | 84.00 | -       | 76.96     | 71.77 | -       | 76.09      | 73.69 | -       |
| Arm 2: 2 COVID-19 + Tdap       | Ratio  | 1.23       | 1.28  |         | 1.29      | 1.05  |         | 1.46       | 1.06  |         |
|                                | N      | 1          | 2     |         | 1         | 2     |         | 1          | 2     |         |
| Arm 1: 2 COVID-19 + Tdap + Flu | MP(%)  | 55.04      | 46.67 | 0.845   | 59.49     | 47.61 | 0.853   | 52.19      | 48.78 | 0.163   |
|                                | CB (%) | 67.84      | 72.40 | 0.799   | 79.96     | 66.55 | 0.716   | 76.09      | 72.23 | 0.463   |
| Arm 2: 2 COVID-19 + Flu        | Ratio  | 1.23       | 1.79  | 0.674   | 1.29      | 1.99  | 0.748   | 1.46       | 1.48  | 0.698   |

|                             |        |       |       |       |       |       |       |       |       |              |
|-----------------------------|--------|-------|-------|-------|-------|-------|-------|-------|-------|--------------|
| Arm 1: 2 COVID-19 +<br>Tdap | N      | 1     | 1     |       | 1     | 1     |       | 1     | 1     |              |
|                             | MP(%)  | 65.81 | 86.09 |       | 68.34 | 28.67 |       | 69.44 | 8.73  |              |
| Arm 2: 2 COVID-19           | CB (%) | 84.00 | 87.34 | -     | 71.77 | 32.94 | -     | 73.69 | 27.14 | -            |
|                             | Ratio  | 1.28  | 1.01  |       | 1.05  | 1.15  |       | 1.06  | 3.11  |              |
| Arm 1: 2 COVID-19 +<br>Flu  | N      | 2     | 1     |       | 2     | 1     |       | 2     | 1     |              |
|                             | MP(%)  | 46.67 | 86.09 | 0.450 | 47.61 | 28.67 | 0.772 | 48.78 | 8.73  | <b>0.014</b> |
| Arm 2: 2 COVID-19           | CB (%) | 72.40 | 87.34 | 0.478 | 66.55 | 32.94 | 0.365 | 72.23 | 27.14 | <b>0.048</b> |
|                             | Ratio  | 1.79  | 1.01  | 0.578 | 1.99  | 1.15  | 0.702 | 1.48  | 3.11  | <b>0.017</b> |
| Arm 1: 2 COVID-19 +<br>Tdap | N      | 1     | 2     |       | 1     | 2     |       | 1     | 2     |              |
|                             | MP(%)  | 65.81 | 46.67 | 0.671 | 68.34 | 47.61 | 0.753 | 69.44 | 48.78 | <b>0.027</b> |
| Arm 2: 2 COVID-19 +<br>Flu  | CB (%) | 84.00 | 72.40 | 0.559 | 71.77 | 66.55 | 0.850 | 73.69 | 72.23 | 0.743        |
|                             | Ratio  | 1.28  | 1.79  | 0.696 | 1.05  | 1.99  | 0.673 | 1.06  | 1.48  | 0.066        |

MP, maternal plasma; CB, cord blood; COVID-19, COVID-19 vaccines; Tdap, tetanus toxoid, reduced diphtheria toxoid, and acellular pertussis vaccine; Flu, influenza vaccine; Words in bold: p value with significance.

**Table S10.** SRBD IgG binding ratio for SARS-CoV-2 alpha, beta, and gamma variants with different vaccines combinations and a 10 – 12-week interval between the 2<sup>nd</sup> dose of COVID-19 vaccine and childbirth.

|                                   |        | Alpha type |       |         | Beta type |       |         | Gamma type |       |         |       |
|-----------------------------------|--------|------------|-------|---------|-----------|-------|---------|------------|-------|---------|-------|
| Interval 10 – 12 weeks            |        | Arm 1      | Arm 2 | p value | Arm 1     | Arm 2 | p value | Arm 1      | Arm 2 | p value |       |
| Arm 1: 2 COVID-19 +<br>Tdap + Flu | N      | 4          |       |         | 4         |       |         | 4          |       |         |       |
|                                   | MP (%) | 61.54      |       |         | 45.22     |       |         | 49.49      |       |         |       |
|                                   | CB (%) | 82.40      | 0     | -       | 54.31     | 0     | -       | 54.99      | 0     | -       |       |
| Arm 2: 2 COVID-19                 |        | Ratio      | 1.44  |         | 1.19      |       |         | 1.24       |       |         |       |
| Arm 1: 2 COVID-19 +<br>Tdap + Flu | N      | 4          | 2     |         | 4         | 2     |         | 4          | 2     |         |       |
|                                   | MP (%) | 61.54      | 47.49 | 0.378   | 45.22     | 42.81 | 0.902   | 49.49      | 61.52 | 0.487   |       |
|                                   | CB (%) | 82.40      | 67.21 | 0.070   | 54.31     | 58.65 | 0.753   | 54.99      | 71.55 | 0.176   |       |
| Arm 2: 2 COVID-19 +<br>Tdap       |        | Ratio      | 1.44  | 1.46    | 0.959     | 1.19  | 1.57    | 0.420      | 1.24  | 1.18    | 0.888 |
| Arm 1: 2 COVID-19 +<br>Tdap + Flu | N      | 4          | 2     |         | 4         | 2     |         | 4          | 2     |         |       |
|                                   | MP (%) | 61.54      | 75.90 | 0.458   | 45.22     | 36.43 | 0.800   | 49.49      | 43.76 | 0.809   |       |
|                                   | CB (%) | 82.40      | 84.81 | 0.812   | 54.31     | 55.79 | 0.923   | 54.99      | 52.64 | 0.881   |       |
| Arm 2: 2 COVID-19 +<br>Flu        |        | Ratio      | 1.44  | 1.13    | 0.193     | 1.19  | 2.94    | 0.525      | 1.24  | 1.49    | 0.627 |
| Arm 1: 2 COVID-19 +<br>Tdap       | N      | 2          |       |         | 2         |       |         | 2          |       |         |       |
|                                   | MP (%) | 47.49      |       |         | 42.81     |       |         | 61.53      |       |         |       |
|                                   | CB (%) | 67.21      | 0     | -       | 58.65     | 0     | -       | 71.55      | 0     | -       |       |
| Arm 2: 2 COVID-19                 |        | Ratio      | 1.46  |         | 1.57      |       |         | 1.18       |       |         |       |
| Arm 1: 2 COVID-19 +<br>Flu        | N      | 2          |       |         | 2         |       |         | 2          |       |         |       |
|                                   | MP (%) | 75.90      |       |         | 36.43     |       |         | 43.76      |       |         |       |
|                                   | CB (%) | 84.81      | 0     | -       | 55.79     | 0     | -       | 52.64      | 0     | -       |       |
| Arm 2: 2 COVID-19                 |        | Ratio      | 1.13  |         | 2.94      |       |         | 1.49       |       |         |       |
| Arm 1: 2 COVID-19 +<br>Tdap       | N      | 2          | 2     |         | 2         | 2     |         | 2          | 2     |         |       |
|                                   | MP (%) | 47.49      | 75.90 | 0.191   | 42.81     | 36.43 | 0.857   | 61.53      | 43.76 | 0.581   |       |
|                                   | CB (%) | 67.21      | 84.81 | 0.142   | 58.65     | 55.79 | 0.806   | 71.55      | 52.64 | 0.415   |       |
| Arm 2: 2 COVID-19 +<br>Flu        |        | Ratio      | 1.46  | 1.13    | 0.326     | 1.57  | 2.94    | 0.561      | 1.18  | 1.49    | 0.612 |

MP, maternal plasma; CB, cord blood; COVID-19, COVID-19 vaccines; Tdap, tetanus toxoid, reduced diphtheria toxoid, and acellular pertussis vaccine; Flu, influenza vaccine.

**Table S11.** SRBD IgG binding ratio for SARS-CoV-2 alpha, beta, and gamma variants with different vaccines combinations and a >12-week interval between the 2<sup>nd</sup> dose of COVID-19 vaccine and childbirth.

|                                   |        | Alpha type |       |         | Beta type |       |         | Gamma type |       |         |
|-----------------------------------|--------|------------|-------|---------|-----------|-------|---------|------------|-------|---------|
| Interval > 12 weeks               |        | Arm 1      | Arm 2 | p value | Arm 1     | Arm 2 | p value | Arm 1      | Arm 2 | p value |
| Arm 1: 2 COVID-19 +<br>Tdap + Flu | N      | 1          |       |         | 1         |       |         | 1          |       |         |
|                                   | MP (%) | 0          | 91.21 | -       | 0         | 27.98 | -       | 0          | 20.19 | -       |
|                                   | CB (%) |            | 93.36 |         |           | 36.50 |         |            | 47.82 |         |
| Arm 2: 2 COVID-19                 | Ratio  |            | 1.02  |         |           | 1.30  |         |            | 2.29  |         |
|                                   | N      | 3          |       |         | 3         |       |         | 3          |       |         |
|                                   | MP (%) | 0          | 90.00 | -       | 0         | 47.72 | -       | 0          | 32.53 | -       |
| Arm 2: 2 COVID-19 +<br>Tdap       | CB (%) |            | 94.57 |         |           | 59.65 |         |            | 53.90 |         |
|                                   | Ratio  |            | 1.05  |         |           | 1.60  |         |            | 2.67  |         |
| Arm 1: 2 COVID-19 +<br>Tdap + Flu | N      | 2          |       |         | 2         |       |         | 2          |       |         |
|                                   | MP (%) | 0          | 78.82 | -       | 0         | 41.47 | -       | 0          | 40.49 | -       |
|                                   | CB (%) |            | 83.86 |         |           | 48.33 |         |            | 53.01 |         |
| Arm 2: 2 COVID-19 +<br>Flu        | Ratio  |            | 1.06  |         |           | 4.01  |         |            | 2.87  |         |
| Arm 1: 2 COVID-19 +<br>Tdap       | N      | 3          | 1     |         | 3         | 1     |         | 3          | 1     |         |
|                                   | MP (%) | 90.00      | 91.21 | 0.858   | 47.72     | 27.98 | 0.694   | 32.53      | 20.79 | 0.811   |
|                                   | CB (%) | 94.57      | 93.36 | 0.712   | 59.65     | 36.50 | 0.539   | 53.90      | 47.82 | 0.894   |
| Arm 2: 2 COVID-19                 | Ratio  | 1.05       | 1.02  | 0.673   | 1.60      | 1.30  | 0.746   | 2.67       | 2.29  | 0.894   |
| Arm 1: 2 COVID-19 +<br>Flu        | N      | 2          | 1     |         | 2         | 1     |         | 2          | 1     |         |
|                                   | MP (%) | 78.82      | 91.21 | 0.198   | 41.47     | 27.98 | 0.876   | 40.49      | 20.79 | 0.805   |
|                                   | CB (%) | 83.86      | 93.36 | 0.531   | 48.33     | 36.50 | 0.872   | 53.01      | 47.82 | 0.940   |
| Arm 2: 2 COVID-19                 | Ratio  | 1.06       | 1.02  | 0.707   | 4.01      | 1.30  | 0.694   | 2.87       | 2.29  | 0.882   |
| Arm 1: 2 COVID-19 +<br>Tdap       | N      | 3          | 2     |         | 3         | 2     |         | 3          | 2     |         |
|                                   | MP (%) | 90.00      | 78.82 | 0.076   | 47.72     | 41.47 | 0.887   | 32.53      | 40.49 | 0.850   |
|                                   | CB (%) | 94.57      | 83.86 | 0.315   | 59.65     | 48.33 | 0.748   | 53.90      | 53.01 | 0.981   |
| Arm 2: 2 COVID-19 +<br>Flu        | Ratio  | 1.05       | 1.06  | 0.852   | 1.60      | 4.01  | 0.569   | 2.67       | 2.87  | 0.930   |

MP, maternal plasma; CB, cord blood; COVID-19, COVID-19 vaccines; Tdap, tetanus toxoid, reduced diphtheria toxoid, and acellular pertussis vaccine; Flu, influenza vaccine.

**Table S12.** SRBD IgG binding ratio for SARS-CoV-2 alpha, beta, and gamma variants with different vaccines combinations and a >6-week interval between the 2<sup>nd</sup> dose of COVID-19 vaccine and childbirth.

|                                   |        | Alpha type |       |         | Beta type |       |         | Gamma type |       |         |
|-----------------------------------|--------|------------|-------|---------|-----------|-------|---------|------------|-------|---------|
| Interval > 6 weeks                |        | Arm 1      | Arm 2 | p value | Arm 1     | Arm 2 | p value | Arm 1      | Arm 2 | p value |
| Arm 1: 2 COVID-19 +<br>Tdap + Flu | N      | 6          | 4     |         | 6         | 4     |         | 6          | 4     |         |
|                                   | MP (%) | 63.18      | 82.23 | 0.071   | 54.07     | 53.02 | 0.950   | 56.72      | 44.64 | 0.526   |
|                                   | CB (%) | 79.29      | 88.94 | 0.128   | 63.04     | 59.02 | 0.793   | 65.21      | 58.49 | 0.664   |
| Arm 2: 2 COVID-19                 | Ratio  | 1.33       | 1.09  | 0.131   | 1.18      | 1.15  | 0.864   | 1.25       | 1.88  | 0.302   |
| Arm 1: 2 COVID-19 +<br>Tdap + Flu | N      | 6          | 7     |         | 6         | 7     |         | 6          | 7     |         |
|                                   | MP (%) | 63.18      | 67.72 | 0.709   | 54.07     | 50.69 | 0.785   | 56.72      | 45.45 | 0.450   |
|                                   | CB (%) | 79.29      | 80.96 | 0.817   | 63.04     | 60.90 | 0.832   | 65.21      | 62.44 | 0.818   |
| Arm 2: 2 COVID-19 +<br>Tdap       | Ratio  | 1.33       | 1.26  | 0.673   | 1.18      | 1.43  | 0.351   | 1.25       | 1.93  | 0.294   |
| Arm 1: 2 COVID-19 +<br>Tdap + Flu | N      | 6          | 8     |         | 6         | 8     |         | 6          | 8     |         |
|                                   | MP (%) | 63.18      | 68.93 | 0.594   | 54.07     | 41.37 | 0.364   | 56.72      | 43.52 | 0.370   |



|                          |        |       |       |       |       |       |       |       |       |       |
|--------------------------|--------|-------|-------|-------|-------|-------|-------|-------|-------|-------|
| Arm 2: 2 COVID-19 + Flu  | CB (%) | 79.29 | 80.33 | 0.841 | 63.04 | 55.20 | 0.553 | 65.21 | 56.49 | 0.530 |
|                          | Ratio  | 1.33  | 1.27  | 0.787 | 1.18  | 2.55  | 0.130 | 1.25  | 1.76  | 0.338 |
|                          | N      | 7     | 4     |       | 7     | 4     |       | 7     | 4     |       |
| Arm 1: 2 COVID-19 + Tdap | MP (%) | 67.72 | 82.23 | 0.166 | 50.69 | 53.02 | 0.892 | 45.45 | 44.64 | 0.967 |
|                          | CB (%) | 80.96 | 88.94 | 0.219 | 60.90 | 59.02 | 0.890 | 62.44 | 58.49 | 0.802 |
|                          | Ratio  | 1.26  | 1.09  | 0.214 | 1.43  | 1.15  | 0.258 | 1.93  | 1.88  | 0.954 |
| Arm 2: 2 COVID-19 + Flu  | N      | 8     | 4     |       | 8     | 4     |       | 8     | 4     |       |
|                          | MP (%) | 68.93 | 82.23 | 0.225 | 41.37 | 53.02 | 0.561 | 43.52 | 44.64 | 0.954 |
|                          | CB (%) | 80.33 | 88.94 | 0.096 | 55.20 | 59.02 | 0.822 | 56.49 | 58.49 | 0.909 |
| Arm 2: 2 COVID-19 + Flu  | Ratio  | 1.27  | 1.09  | 0.449 | 2.55  | 1.15  | 0.123 | 1.76  | 1.88  | 0.866 |
|                          | N      | 7     | 8     |       | 7     | 8     |       | 7     | 8     |       |
|                          | MP (%) | 67.72 | 68.93 | 0.913 | 50.69 | 41.37 | 0.553 | 45.45 | 43.52 | 0.897 |
| Arm 2: 2 COVID-19 + Flu  | CB (%) | 80.96 | 80.33 | 0.921 | 60.90 | 55.20 | 0.632 | 62.44 | 56.49 | 0.661 |
|                          | Ratio  | 1.26  | 1.27  | 0.964 | 1.43  | 2.55  | 0.213 | 1.93  | 1.76  | 0.808 |

MP, maternal plasma; CB, cord blood; COVID-19, COVID-19 vaccines; Tdap, tetanus toxoid, reduced diphtheria toxoid, and acellular pertussis vaccine; Flu, influenza vaccine.

**Table S13.** SRBD IgG binding ratio for SARS-CoV-2 alpha, beta, and gamma variants with different vaccines combinations and a  $\leq 12$ -week interval between the 2<sup>nd</sup> dose of COVID-19 vaccine and childbirth.

|                                |        | Alpha type |       |              | Beta type |       |         | Gamma type |       |         |
|--------------------------------|--------|------------|-------|--------------|-----------|-------|---------|------------|-------|---------|
| Interval $\leq 12$ weeks       |        | Arm 1      | Arm 2 | p value      | Arm 1     | Arm 2 | p value | Arm 1      | Arm 2 | p value |
|                                | N      | 7          | 6     |              | 7         | 6     |         | 7          | 6     |         |
| Arm 1: 2 COVID-19 + Tdap + Flu | MP (%) | 67.84      | 83.56 | 0.118        | 58.23     | 65.54 | 0.545   | 58.96      | 61.13 | 0.883   |
|                                | CB (%) | 81.87      | 88.49 | 0.228        | 66.98     | 65.37 | 0.888   | 68.81      | 67.01 | 0.889   |
| Arm 2: 2 COVID-19              | Ratio  | 1.29       | 1.06  | 0.121        | 1.16      | 1.04  | 0.355   | 1.25       | 1.40  | 0.668   |
|                                | N      | 7          | 5     |              | 7         | 5     |         | 7          | 5     |         |
| Arm 1: 2 COVID-19 + Tdap + Flu | MP (%) | 67.84      | 54.09 | 0.234        | 58.23     | 57.73 | 0.964   | 58.96      | 54.69 | 0.720   |
|                                | CB (%) | 81.87      | 70.83 | 0.096        | 66.98     | 62.95 | 0.681   | 68.81      | 67.39 | 0.870   |
| Arm 2: 2 COVID-19 + Tdap       | Ratio  | 1.29       | 1.35  | 0.722        | 1.16      | 1.22  | 0.819   | 1.25       | 1.34  | 0.719   |
|                                | N      | 7          | 6     |              | 7         | 6     |         | 7          | 6     |         |
| Arm 1: 2 COVID-19 + Tdap + Flu | MP (%) | 67.84      | 65.63 | 0.858        | 58.23     | 41.33 | 0.263   | 58.96      | 44.52 | 0.286   |
|                                | CB (%) | 81.87      | 79.15 | 0.651        | 66.98     | 57.49 | 0.444   | 68.81      | 57.66 | 0.407   |
| Arm 2: 2 COVID-19 + Flu        | Ratio  | 1.29       | 1.34  | 0.822        | 1.16      | 2.06  | 0.215   | 1.25       | 1.39  | 0.486   |
|                                | N      | 5          | 6     |              | 5         | 6     |         | 5          | 6     |         |
| Arm 1: 2 COVID-19 + Tdap       | MP (%) | 54.09      | 83.56 | <b>0.002</b> | 57.73     | 65.54 | 0.566   | 54.69      | 61.13 | 0.684   |
|                                | CB (%) | 70.83      | 88.49 | <b>0.003</b> | 62.95     | 65.37 | 0.787   | 67.39      | 67.01 | 0.975   |
| Arm 2: 2 COVID-19              | Ratio  | 1.35       | 1.06  | 0.057        | 1.22      | 1.04  | 0.453   | 1.34       | 1.40  | 0.876   |
|                                | N      | 6          | 6     |              | 6         | 6     |         | 6          | 6     |         |
| Arm 1: 2 COVID-19 + Flu        | MP (%) | 65.63      | 83.56 | 0.093        | 41.33     | 65.54 | 0.151   | 44.52      | 61.13 | 0.325   |
|                                | CB (%) | 79.15      | 88.49 | 0.065        | 57.49     | 65.37 | 0.537   | 57.66      | 67.01 | 0.541   |
| Arm 2: 2 COVID-19              | Ratio  | 1.34       | 1.06  | 0.222        | 2.06      | 1.04  | 0.166   | 1.39       | 1.40  | 0.979   |
|                                | N      | 5          | 6     |              | 5         | 6     |         | 5          | 6     |         |
| Arm 1: 2 COVID-19 + Tdap       | MP (%) | 54.09      | 65.63 | 0.322        | 57.73     | 41.33 | 0.298   | 54.69      | 44.52 | 0.457   |
|                                | CB (%) | 70.83      | 79.15 | 0.137        | 62.95     | 57.49 | 0.618   | 67.39      | 57.66 | 0.420   |
| Arm 2: 2 COVID-19 + Flu        | Ratio  | 1.35       | 1.34  | 0.972        | 1.22      | 2.06  | 0.252   | 1.34       | 1.39  | 0.813   |

MP, maternal plasma; CB, cord blood; COVID-19, COVID-19 vaccines; Tdap, tetanus toxoid, reduced diphtheria toxoid, and acellular pertussis vaccine; Flu, influenza vaccine; Words in bold: p value with significance.
